# Supplementary figures and images for: Prevalence of diabetes and cardio‐metabolic risk factors in young men in the United Arab Emirates: A cross‐sectional national survey
Source: PubMed Central journal article supplement — Endocrinol Diabetes Metab. 2019 Jun 28;2(4):e00081. doi: 10.1002/edm2.81 (PMC6775448; doi:10.1002/edm2.81), 2019-06-28

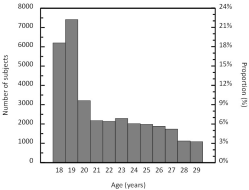

Supplement: EDM2-2-e00081-s001.pdf [file EDM2-2-e00081-s001.pdf]

Percent (%) of all subjects

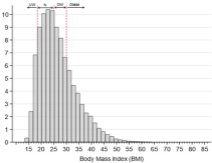

Supplement: EDM2-2-e00081-s002.pdf [file EDM2-2-e00081-s002.pdf]

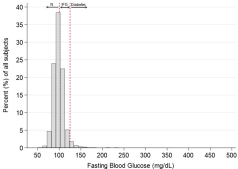

Supplement: EDM2-2-e00081-s003.pdf [file EDM2-2-e00081-s003.pdf]

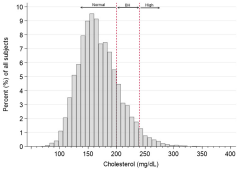

Supplement: EDM2-2-e00081-s004.pdf [file EDM2-2-e00081-s004.pdf]

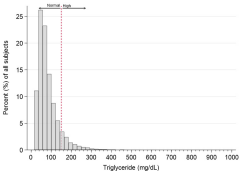

Supplement: EDM2-2-e00081-s005.pdf [file EDM2-2-e00081-s005.pdf]

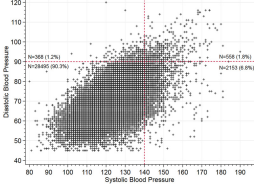

Supplement: EDM2-2-e00081-s006.pdf [file EDM2-2-e00081-s006.pdf]
